# Supplementary material for: Real-Time Reverse-Transcription Quantitative Polymerase Chain Reaction Assay Is a Feasible Method for the Relative Quantification of Heregulin Expression in Non–Small Cell Lung Cancer Tissue
Source: PubMed Central journal article supplement — Biomark Insights. 2017 Mar 30;12:1177271917699850. doi: 10.1177/1177271917699850 (PMC5391987; doi:10.1177/1177271917699850), 2017-03-30
Supplement: f_SupplementaryMaterial_699850_8477.pdf [file f_SupplementaryMaterial_699850_8477.pdf]

1 **Appendix**

2 **Supplemental Table S1** Initial RNA extraction comparison between Qiagen FFPE and Ambion PureLink

3 methods

| RNA origin          | RNA concentration |          | Total RNA yield (ng) |          | A260/A280 |          |
|---------------------|-------------------|----------|----------------------|----------|-----------|----------|
|                     | (ng/uL)           |          | Qiagen               | Purelink | Qiagen    | Purelink |
|                     | Qiagen            | Purelink | Qiagen               | Purelink | Qiagen    | Purelink |
| <b>FFPE NSCLC</b>   |                   |          |                      |          |           |          |
| 1173737B            | 13.0              | 7.6      | 390                  | 229      | 1.94      | 2.07     |
| 1173692B            | 127.2             | 16.8     | 3815                 | 503      | 1.79      | 1.65     |
| 1173127B            | 78.0              | 14.4     | 2339                 | 432      | 1.82      | 1.78     |
| 1173740B            | 170.4             | 54.7     | 5113                 | 1641     | 1.87      | 1.88     |
| 2YHODAZN            | 121.7             | 49.4     | 3650                 | 1482     | 1.90      | 2.01     |
| AF8ALAN9            | 67.9              | 6.8      | 2037                 | 204      | 1.86      | 1.94     |
| QISIZA1M            | 107.8             | 52.3     | 3233                 | 1569     | 1.92      | 2.01     |
| TRQR7A81            | 299.5             | 72.5     | 8986                 | 2175     | 1.97      | 2.07     |
| <b>Cell lines*</b>  |                   |          |                      |          |           |          |
| FFPE <i>HRG</i> +   | 58.2              | 46.9     | 1746                 | 1406     | 1.84      | 2.01     |
| FFPE <i>HRG</i> (-) | 153.5             | 64.5     | 4604                 | 1934     | 1.88      | 2.00     |

4 \**HRG*-positive cell line = A549 and *HRG*-negative cell line = T47D.
